# Supplementary material
Source: bioRxiv or medRxiv preprint supplement (https://www.biorxiv.org/highwire/filestream/38334/field_highwire_adjunct_files/2/130443-3.pdf)
Supplement: Supplementary file [file 130443-3.pdf]

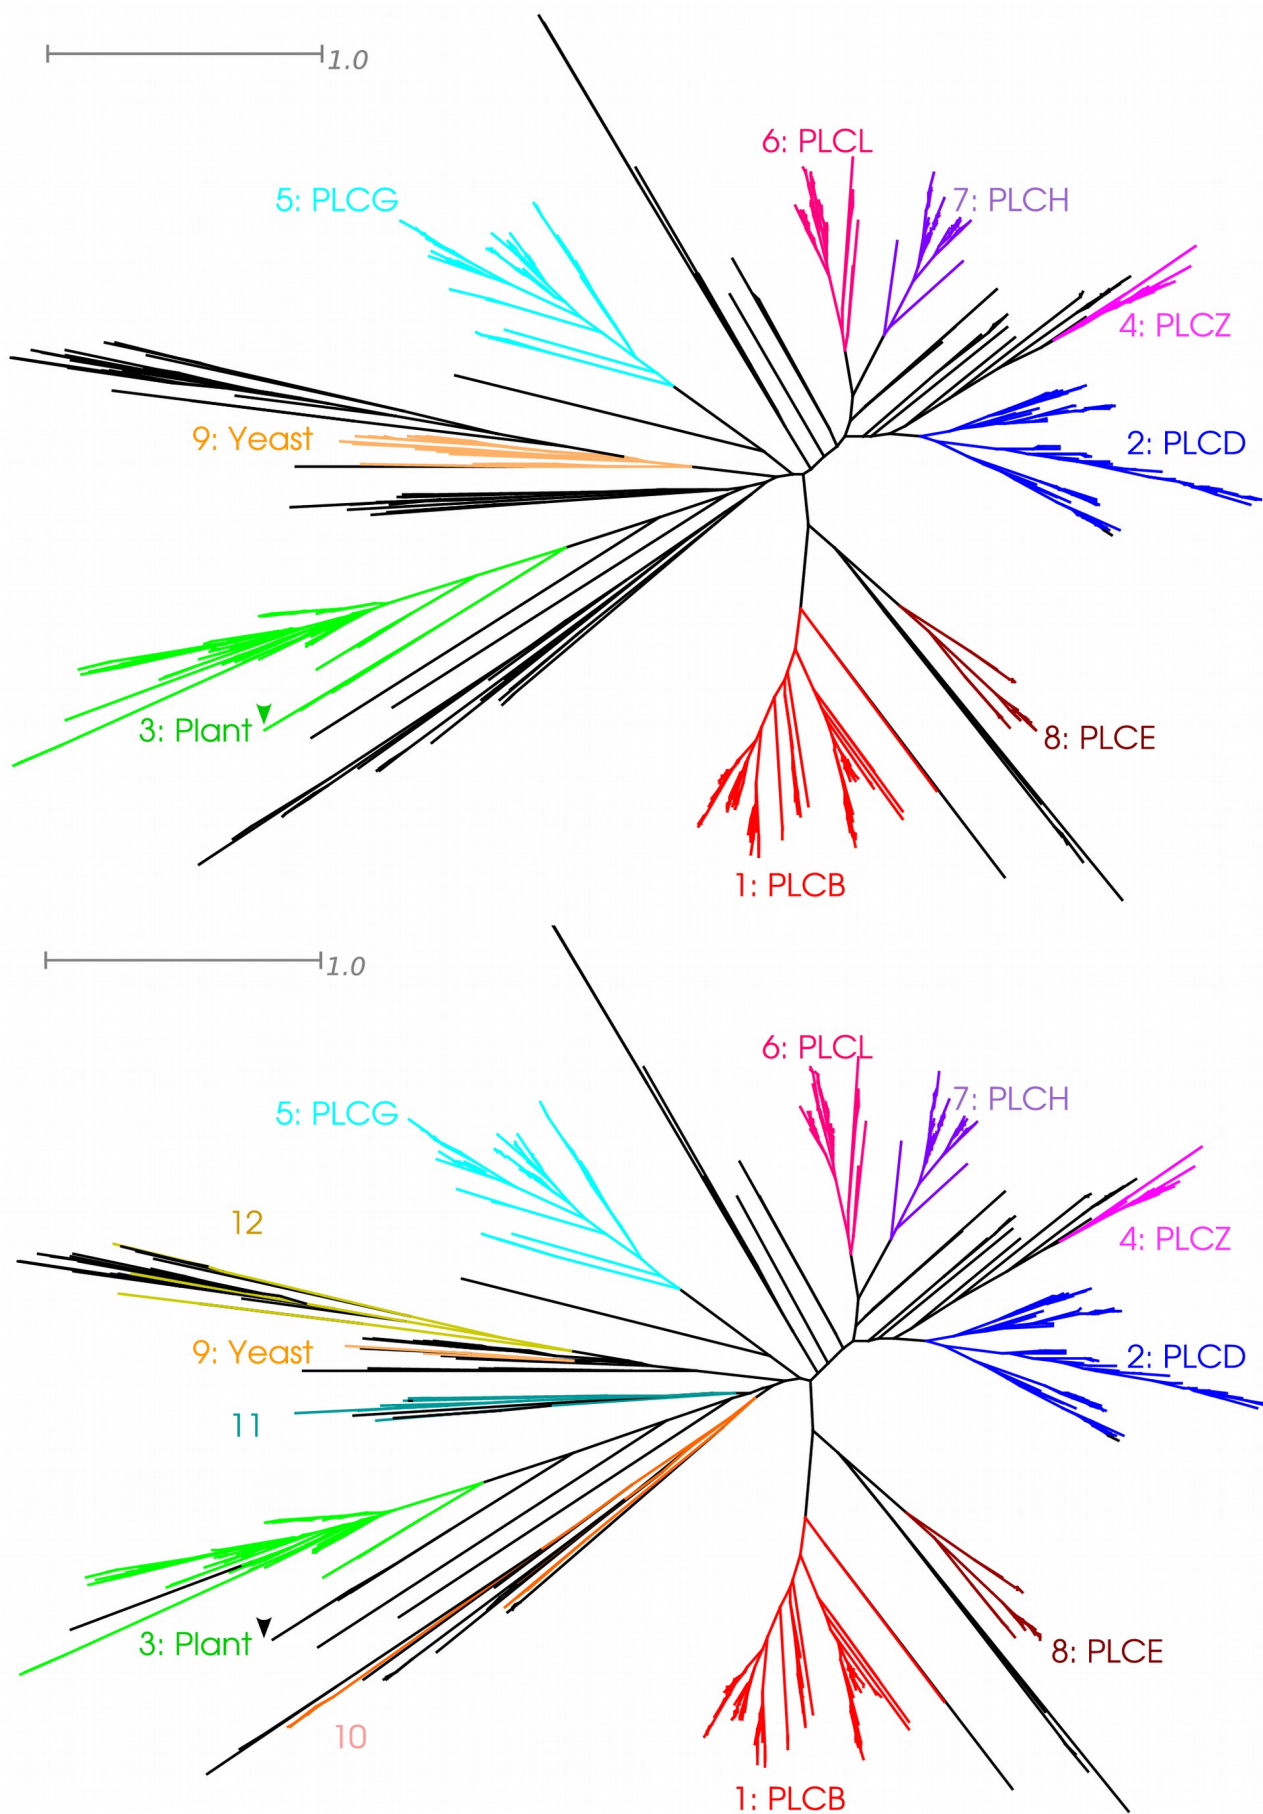

**S Fig 4: HMMERCTTER Classification of the Phospholipase C superfamily**

Numerical analysis in Table 3, details in context. Scale bars indicate 0.1 amino acid substitution per site. (A) Initial classification of nine described PLC subfamilies. (B) Classification upon inclusion of additional clusters to the training set. Sequences in black are not classified. The arrowheads point to a difference in the classification of Plant PLCs.
